# Supplementary material for: Ocean control on sea ice in the Nordic Seas
Source: Copernicus journal article supplement (doi:10.5194/egusphere-2025-1542), 2025-04-10
Supplement: Supplementary file 1 [file egusphere-2025-1542-supplement.pdf]

# Supplementary to: Ocean control on sea ice in the Nordic Seas

Wanyee Wong<sup>1</sup>, Bjørg Risebrobakken<sup>1</sup>, Malin Ödalen<sup>1</sup>, Amandine Aline Tisserand<sup>1</sup>, Kirsten Fahl<sup>3</sup>,  
Ruediger Stein<sup>3,4,5</sup>, Eystein Jansen<sup>1,2</sup>

<sup>1</sup>NORCE Norwegian Research Centre, Bjerknes Centre for Climate Research, 5007 Bergen, Norway

5 <sup>2</sup>Department of Earth Science, University of Bergen, Bjerknes Centre for Climate Research, 5007 Bergen, Norway

<sup>3</sup>Alfred Wegener Institute, Helmholtz Centre for Polar and Marine Research, 27568 Bremerhaven, Germany

<sup>4</sup>Faculty of Geosciences (FB5) and Center for Marine Environmental Sciences (MARUM), University of Bremen, 28359  
Bremen, Germany

<sup>5</sup>Key Laboratory of Marine Chemistry Theory and Technology, Ocean University of China, 266100 Qingdao, China

10 *Correspondence to:* Wanyee Wong ([yunw@norce-research.no](mailto:yunw@norce-research.no))

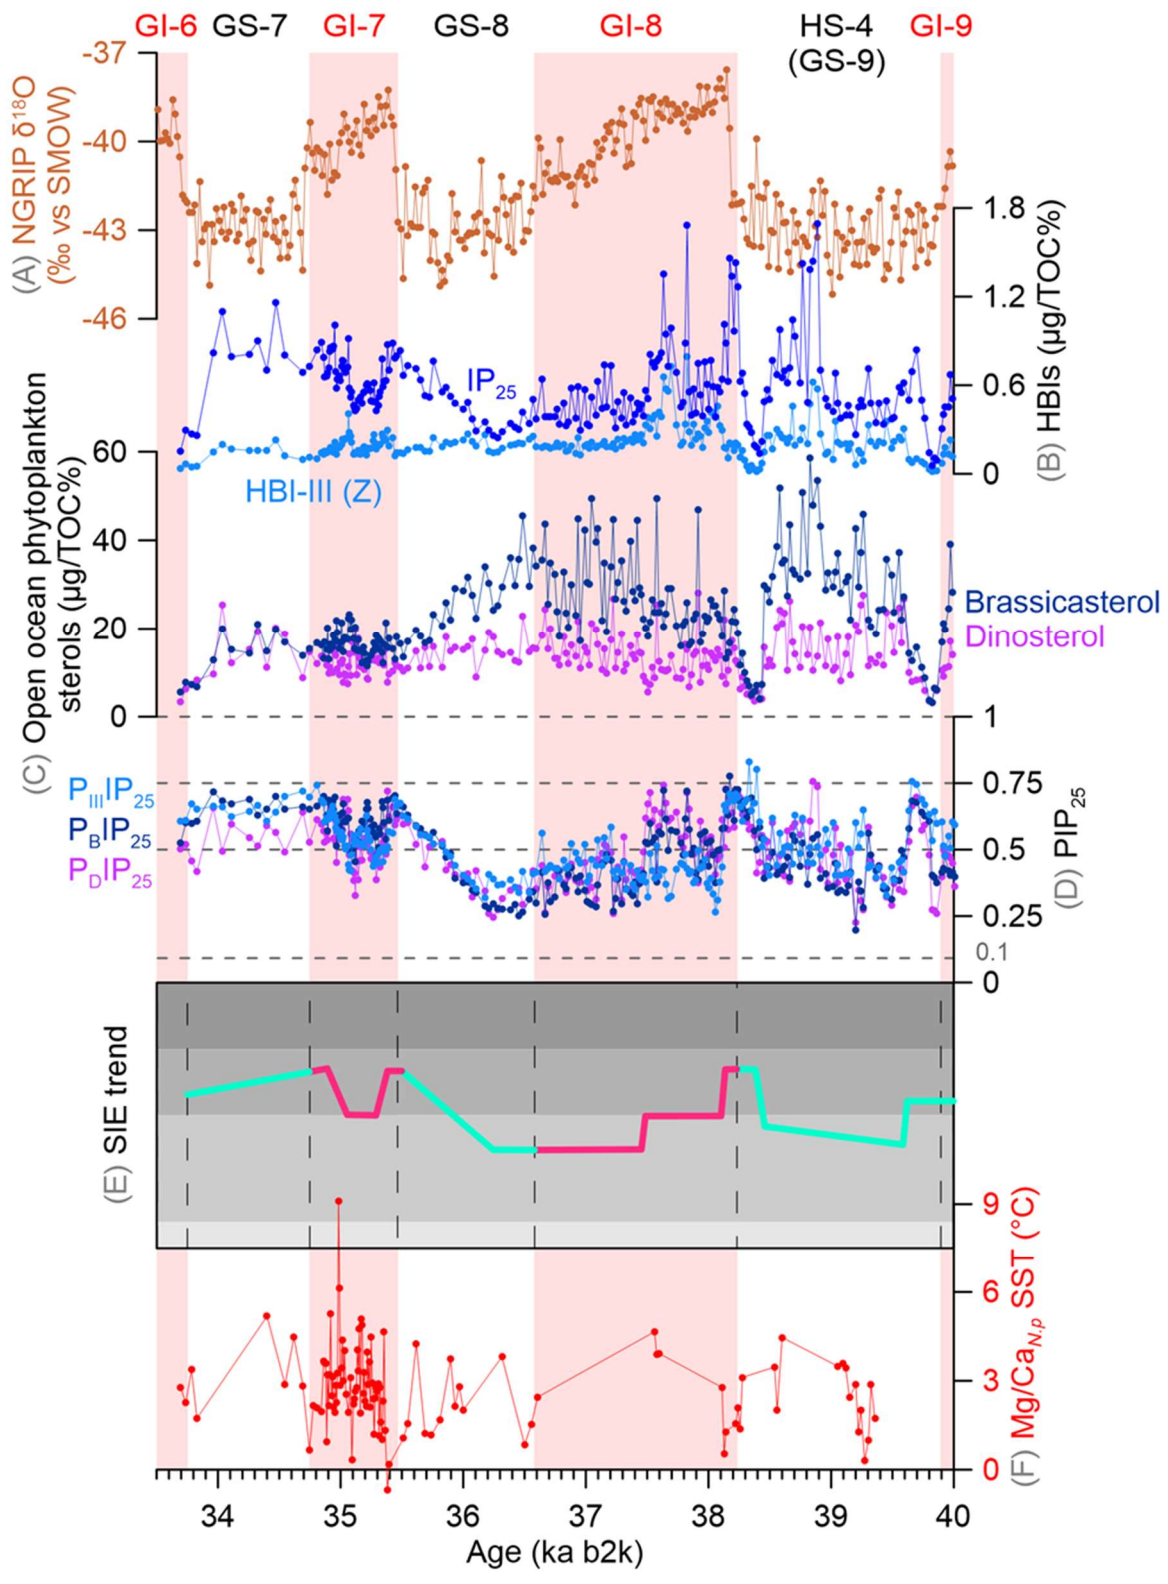

15 **Figure S1. Biomarker results from MD99-2304 with NGRIP  $\delta^{18}\text{O}$  as a reference. (A) NGRIP  $\delta^{18}\text{O}$  (‰ vs SMOW) (GIC05 age model) (North Greenland Ice Core Project members, 2004; Andersen et al., 2006), (B)  $\text{IP}_{25}$  and HBI-III (Z), (C) brassicasterol and dinosterol, (D)  $\text{PIP}_{25}$ , (E) SIE trend based on  $\text{PIP}_{25}$  indices, and (F) SubST reconstruction from *N. pachyderma* Mg/Ca. These records are expressed in terms of ka 2bk. The pink bars indicate GIs as defined in the NGRIP ice core (Rasmussen et al., 2014). The dash lines at  $\text{PIP}_{25}$  indices stand for categories of sea ice conditions (from darkest to lightest: 0.75–1 extensive sea ice, 0.5–0.75 seasonal ice / stable ice edge, 0.1–0.5 limited but variable ice, 0–0.1 ice-free) (Xiao et al., 2015; Stein et al., 2017).**
